# Supplementary material for: The Bugs in the Bags: The Risk Associated with the Introduction of Small Quantities of Fruit and Plants by Airline Passengers
Source: MDPI journal article supplement (doi:10.3390/insects13070617), 2022-07-10
Supplement: s1 [file s1]

**Table S1.** Plant material species seized at BCPs of Campania region and number of loads resulted positive at the presence of arthropods. AP, airport; PN, port of Naples; PS port of Salerno.

| Botanical species                | n. of entry | BCP | Positive | Botanical species               | n. of entry | BCP | Positive |
|----------------------------------|-------------|-----|----------|---------------------------------|-------------|-----|----------|
| <i>Abelmoschus esculentus</i>    | 3           | AP  | 1        | <i>Loropetalum chinense</i>     | 2           | PN  | 0        |
| <i>Aegle marmelos</i>            | 2           | AP  | 0        | <i>Malus domestica</i>          | 1           | AP  | 1        |
| <i>Allium cepa</i>               | 3           | AP  | 0        | <i>Mammillaria elongata</i>     | 2           | PN  | 0        |
| <i>Ananas comosus</i>            | 1           | AP  | 0        | <i>Mammillaria hahniana</i>     | 1           | PN  | 0        |
| <i>Annona cherimola</i>          | 1           | AP  | 0        | <i>Mammillaria sp.</i>          | 1           | PN  | 0        |
| <i>Annona glabra</i>             | 1           | AP  | 0        | <i>Mammillaria spinosissima</i> | 1           | PN  | 0        |
| <i>Areca catechu</i>             | 1           | AP  | 0        | <i>Mangifera indica</i>         | 20          | AP  | 2        |
| <i>Artocarpus heterophyllus</i>  | 2           | AP  | 1        | <i>Manilkara zapota</i>         | 1           | AP  | 0        |
| <i>Asplenium nidus</i>           | 1           | AP  | 0        | <i>Mentha sp.</i>               | 1           | AP  | 0        |
| <i>Baccaurea ramiflora</i>       | 2           | AP  | 0        | <i>Momordica charantia</i>      | 3           | AP  | 1        |
| <i>Bambuseae</i>                 | 1           | AP  | 0        | <i>Moringa oleifera</i>         | 2           | AP  | 0        |
| <i>Beaucarnea</i>                | 1           | PN  | 1        | <i>Musa acuminata</i>           | 2           | AP  | 0        |
| <i>Bougainvillea glabra</i>      | 1           | PN  | 0        | <i>Musa paradisiaca</i>         | 5           | AP  | 0        |
| <i>Bougainvillea spectabilis</i> | 1           | PN  | 0        | <i>Nigella sativa</i>           | 1           | AP  | 0        |
| <i>Butia sp.</i>                 | 1           | PN  | 0        | <i>Olea europaea</i>            | 1           | AP  | 0        |
| <i>Calocasia esculenta</i>       | 1           | AP  | 0        | <i>Oryza sativa</i>             | 1           | PN  | 1        |
| <i>Capsicum sp.</i>              | 11          | AP  | 0        | <i>Parodia schumanniana</i>     | 1           | PN  | 0        |
| <i>Carica papaya</i>             | 8           | AP  | 0        | <i>Passiflora edulis</i>        | 3           | AP  | 0        |
| <i>Ceiba sp.</i>                 | 1           | PN  | 1        | <i>Passiflora sp.</i>           | 2           | AP  | 0        |
| <i>Cereus hildmannianus</i>      | 2           | PN  | 0        | <i>Persea americana</i>         | 11          | AP  | 0        |
| <i>Chorisia sp.</i>              | 1           | PN  | 0        | <i>Phyllanthus emblica</i>      | 1           | AP  | 0        |
| <i>Cinnamomum verum</i>          | 1           | AP  | 0        | <i>Phyllostachys nigra</i>      | 1           | PN  | 0        |
| <i>Citrus × bergamia</i>         | 1           | AP  | 0        | <i>Phyllostachys pubescens</i>  | 1           | PN  | 0        |
| <i>Citrus aurantiifolia</i>      | 4           | AP  | 0        | <i>Physalis peruviana</i>       | 1           | AP  | 0        |
| <i>Citrus limon</i>              | 6           | PN  | 4        | <i>Pinus parviflora</i>         | 1           | PN  | 1        |
| <i>Citrus limon</i>              | 1           | PS  | 0        | <i>Piper betle</i>              | 12          | AP  | 0        |
| <i>Citrus maxima</i>             | 1           | AP  | 0        | <i>Pisum sativum</i>            | 1           | AP  | 0        |
| <i>Citrus paradisi</i>           | 2           | AP  | 0        | <i>Podocarpus macrophyllus</i>  | 1           | PN  | 1        |
| <i>Citrus sp.</i>                | 13          | AP  | 0        | <i>Psidium guajava</i>          | 26          | AP  | 3        |
| <i>Citrus aurantium</i>          | 6           | PN  | 4        | <i>Punica granatum</i>          | 3           | AP  | 0        |
| <i>Cocos nucifera</i>            | 2           | AP  | 0        | <i>Saccharum officinarum</i>    | 4           | AP  | 0        |
| <i>Cynara scolymus</i>           | 1           | AP  | 0        | <i>Sanseveria trifascata</i>    | 3           | PN  | 0        |
| <i>Cyperus papyrus</i>           | 1           | AP  | 0        | <i>Solanum aethiopicum</i>      | 5           | AP  | 3        |
| <i>Diospyros kaki</i>            | 1           | AP  | 0        | <i>Solanum betaceum</i>         | 2           | AP  | 0        |
| <i>Dioscorea spp.</i>            | 2           | AP  | 2        | <i>Solanum torvum</i>           | 2           | AP  | 0        |
| <i>Dioscorea spp.</i>            | 1           | PS  | 0        | <i>Solanum tuberosum</i>        | 1           | PS  | 0        |
| <i>Echinocactus grusonii</i>     | 7           | PN  | 0        | <i>Solanum tuberosum</i>        | 1           | AP  | 0        |
| <i>Euphorbia tirucalli</i>       | 2           | PN  | 0        | <i>Spondias dulcis</i>          | 3           | AP  | 0        |
| <i>Fernaldia pandurata</i>       | 1           | AP  | 0        | <i>Tamarindus indica</i>        | 1           | AP  | 1        |
| <i>Ficus hispida</i>             | 1           | AP  | 0        | <i>Terminalia catappa</i>       | 1           | AP  | 1        |
| <i>Ficus microcarpa</i>          | 1           | PS  | 1        | <i>Theobroma cacao</i>          | 1           | AP  | 1        |
| <i>Ficus microcarpa</i>          | 9           | PN  | 2        | <i>Trichosanthes cucumerina</i> | 1           | AP  | 1        |
| <i>Garcinia mangostana</i>       | 1           | AP  | 0        | <i>Triplochiton scleroxylon</i> | 1           | PN  | 1        |
| <i>Gymnocalycium baldianum</i>   | 1           | PN  | 0        | <i>Viburnum tinus</i>           | 1           | AP  | 0        |
| <i>Ilex crenata</i>              | 1           | PN  | 0        | <i>Xhantosoma spp.</i>          | 1           | AP  | 0        |

|                             |   |    |   |                            |    |    |   |
|-----------------------------|---|----|---|----------------------------|----|----|---|
| <i>Jubaea chilensis</i>     | 1 | PN | 0 | <i>Zelkova</i> sp.         | 2  | PN | 0 |
| <i>Lablab purpureus</i>     | 2 | AP | 1 | <i>Zingiber officinale</i> | 2  | AP | 0 |
| <i>Lagerstroemia indica</i> | 1 | PN | 0 | <i>Ziziphus jujuba</i>     | 14 | AP | 1 |
| <i>Lansium parasiticum</i>  | 1 | AP | 1 | <i>Ziziphus mauritiana</i> | 2  | AP | 0 |
| <i>Limonia acidissima</i>   | 1 | AP | 0 |                            |    |    |   |

---
