# Supplementary material for: The Bugs in the Bags: The Risk Associated with the Introduction of Small Quantities of Fruit and Plants by Airline Passengers
Source: MDPI journal article supplement (doi:10.3390/insects13070617), 2022-07-10
Supplement: s1 [file s1]

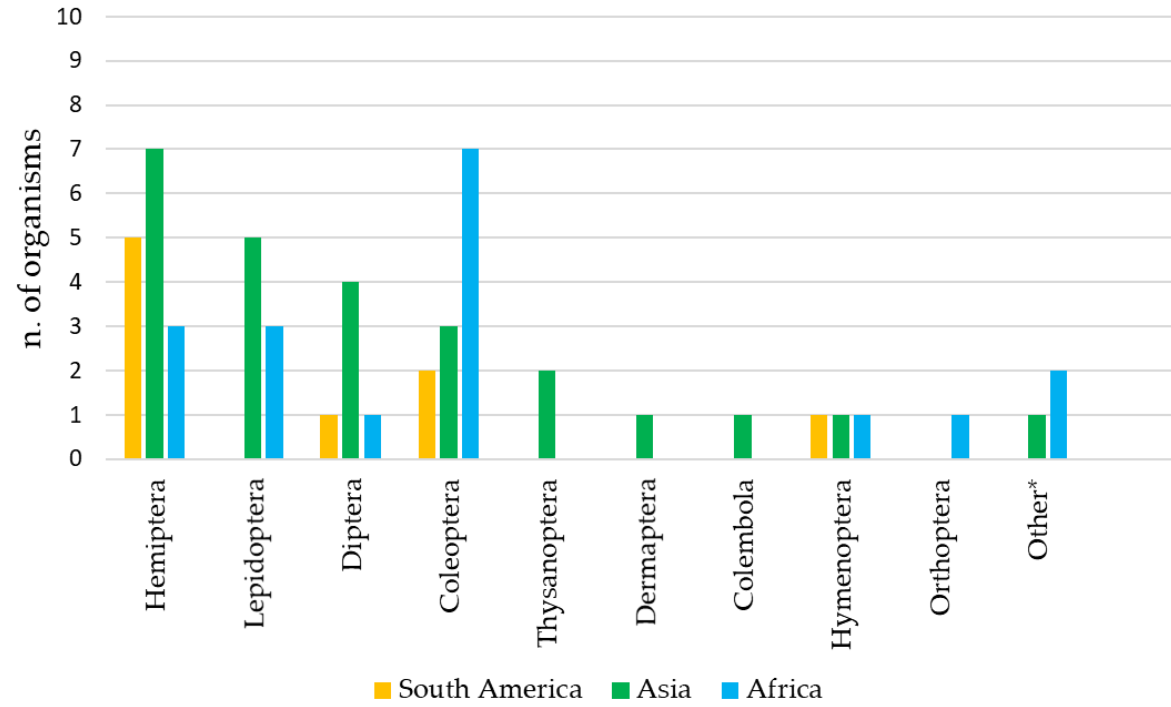

**Figure S2.** Orders of all the organisms intercepted during the inspections at BCPs of Campania region, divided by provenance (\*Aracnida and Diplopoda).
