# Supplementary material for: The Bugs in the Bags: The Risk Associated with the Introduction of Small Quantities of Fruit and Plants by Airline Passengers
Source: Insects. 2022 Jul 10;13(7):617. doi: 10.3390/insects13070617 (PMC9323091; doi:10.3390/insects13070617)
Supplement: Supplementary file 1 [file insects-13-00617-s001.zip]

Archive with 4 entries (4 files):
- Figure S1.pdf
- Figure S2.pdf
- File S1.pdf
- Table S1.pdf
