# Supplementary figures and images for: The Bugs in the Bags: The Risk Associated with the Introduction of Small Quantities of Fruit and Plants by Airline Passengers
Source: MDPI journal article supplement (doi:10.3390/insects13070617), 2022-07-10

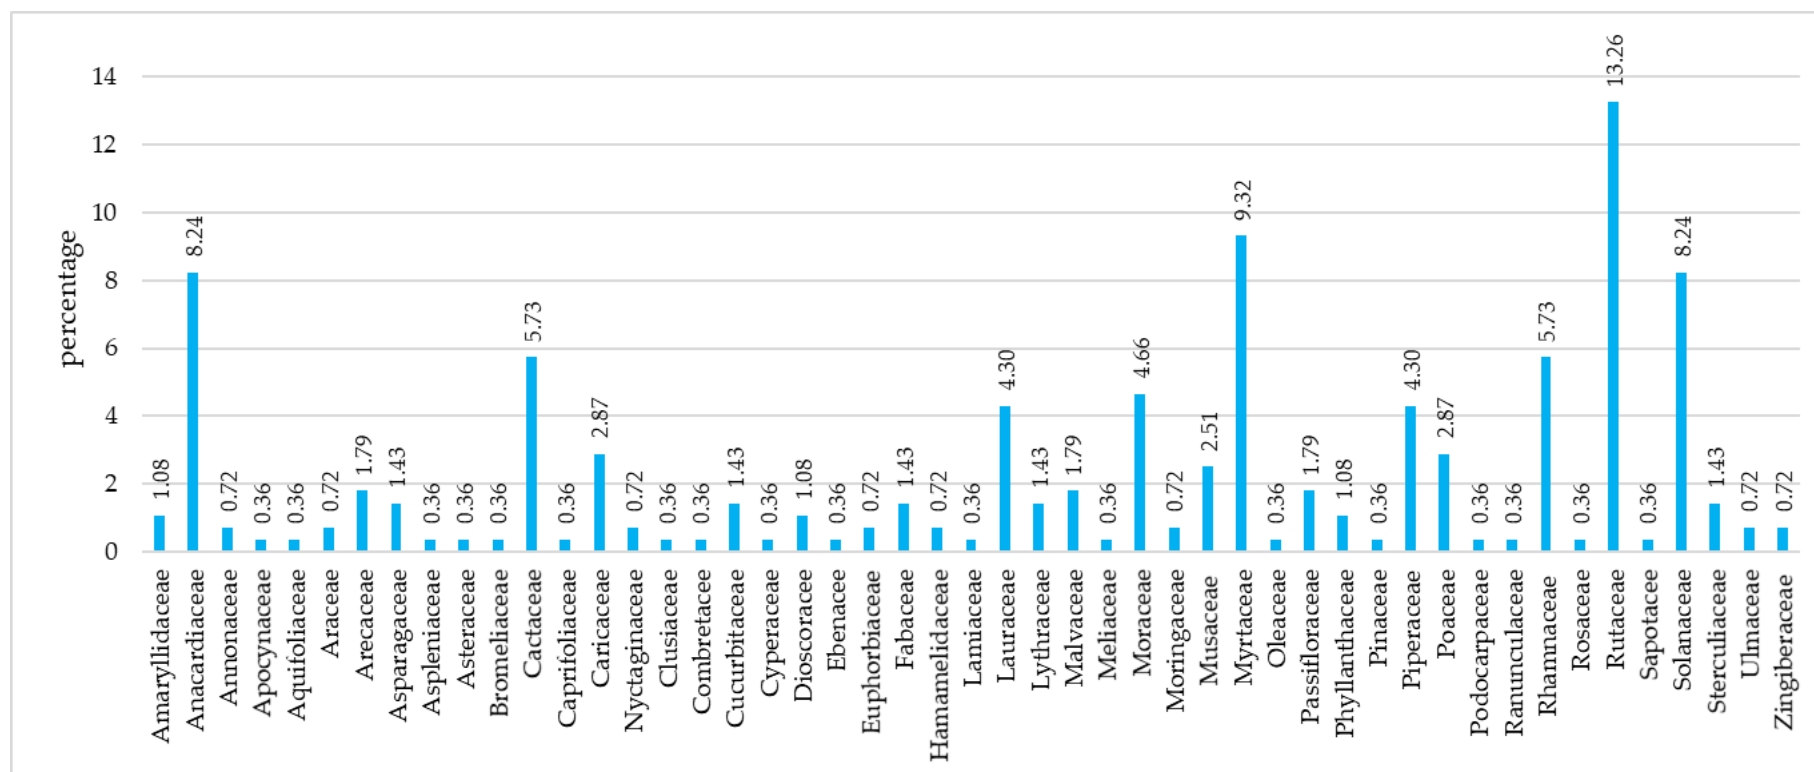

**Figure S1.** Percentage of botanical families which seized plant material belong.

Supplement: s1 [file s1]
